# Supplementary material
Source: Elsevier journal article supplement (https://www.sciencedirect.com/science/article/pii/S1130862120305325)
Supplement: mmc1 [file S1130862120305325:mmc1.pdf]

Número de cuestionario:

Fecha de la entrevista: \_\_\_\_ / \_\_\_\_ /

## ENCUESTA DIRIGIDA A ENFERMERAS DE AP (Previa al Curso)

### A. DATOS SOCIODEMOGRÁFICOS

#### A.1 Año de finalización Estudios de Enfermería:

Año \_\_\_\_\_

99 ☐ NS/NC

#### A.2 Sexo:

1 ☐ Mujer

2 ☐ Hombre

A.3 Año de nacimiento: \_\_\_\_\_

### B. CONOCIMIENTOS

“En personas con enfermedad vascular clínica diagnosticada (IAM, SCA, Revascularización, Ictus; EAP) y según las últimas Guías Europeas<sup>1</sup>, los objetivos de la prevención secundaria cardiovascular son:”

#### B.4 Cifras de Presión arterial: **PROG: RESPUESTA ÚNICA**

1 ☐ < 130/80 mmHg

2 ☐ < 140/90 mmHg

3 ☐ < 135/85 mmHg

9 ☐ No sabe

#### B.5 Cifras de HbA1c. Glucosa Sanguínea: **PROG: RESPUESTA ÚNICA**

1 ☐ ≤ 6,5%

2 ☐ ≤ 7%

3 ☐ ≤ 7,5%

9 ☐ No sabe

<sup>1</sup> Piepoli MF, Hoes AW, Agewall S, Albus C, Brotons C, Catapano AL, et al ; Authors/Task Force Members. 2016 European Guidelines on cardiovascular disease prevention in clinical practice: The Sixth Joint Task Force of the European Society of Cardiology and Other Societies on Cardiovascular Disease Prevention in Clinical Practice. Eur Heart J. 2016 May 23. pii: ehv106

**B.6 Cifras de Colesterol Total:** PROG: RESPUESTA ÚNICA

- 1 ☐  $\approx 200$  mg/dl
- 2 ☐  $\approx 250$  mg/dl
- 3 ☐  $\approx 170$  mg/dl
- 9 ☐ No sabe

**B.7 Cifras de LDL colesterol:** PROG: RESPUESTA ÚNICA

- 1 ☐  $\approx 120$  mg/dl
- 2 ☐  $\approx 100$  mg/dl
- 3 ☐  $\approx 70$  mg/dl
- 9 ☐ No sabe

**B.8 Cifras Perímetro Abdominal:** PROG: RESPUESTA ÚNICA

- 1 ☐ 80-88 mujeres/ 94-102 hombres
- 2 ☐ 90-100 mujeres/ 100-110 hombres
- 3 ☐ 70-80 mujeres/ 80-90 hombres
- 9 ☐ No sabe

**B.9 Cifras Índice Tobillo/Brazo:** PROG: RESPUESTA ÚNICA

- 1 ☐  $\approx 1$
- 2 ☐  $\approx 0,5$
- 3 ☐  $\approx 1,5$
- 9 ☐ No sabe

**C. GRADO DE APLICACIÓN**

**C.10 ¿Atiende, como motivo de consulta, a pacientes que han sufrido un EVENTO CORONARIO (SCA, Angina de pecho, etc.)?** PROG: RESPUESTA ÚNICA

- 1 ☐ Si
- 2 ☐ No PROG: Saltar a C.16

**C.11 Durante los DOS ÚLTIMOS MESES ¿Cuántos pacientes atendidos en su consulta, aproximadamente, han sido por estar diagnosticados de EVENTO CORONARIO (SCA, Angina de pecho, etc.)?** PROG: RESPUESTA ÚNICA

- 1 ☐ Ninguno
- 2 ☐  $\leq 5$  / semana
- 3 ☐ 6-10 / semana

4 ☐ 11- 15 / semana

5 ☐ > 15 / semana

9 ☐ NS/NC

PROG: SOLO SI COD. 2, 3, 4 O 5 EN C.11

**C.12 Y de estos pacientes atendidos por estar diagnosticados de EVENTO CORONARIO ¿Qué porcentaje de ellos le ha realizado las siguientes actividades?** PROG: RESPUESTA ÚNICA POR FILA

|                                                              | Ninguno | ≤10% | 11-30% | 31-50% | >50% | NS/NC |
|--------------------------------------------------------------|---------|------|--------|--------|------|-------|
| 1. Medida del perímetro abdominal                            | 1       | 2    | 3      | 4      | 5    | 9     |
| 2. Valoración de parámetros analíticos dislipémicos          | 1       | 2    | 3      | 4      | 5    | 9     |
| 3. Seguimiento de la adherencia al tratamiento farmacológico | 1       | 2    | 3      | 4      | 5    | 9     |

**C.13 Y ¿cuál es su grado de acuerdo con los siguientes enunciados en relación con los pacientes referidos anteriormente?** PROG: RESPUESTA ÚNICA POR FILA

|                                                                          | En desacuerdo | Algo de acuerdo | Totalmente de acuerdo | NS/NC |
|--------------------------------------------------------------------------|---------------|-----------------|-----------------------|-------|
| 1. “Como no son pacientes crónicos, no los atiendo en consulta.”         | 1             | 2               | 3                     | 9     |
| 2. Son pacientes que no han de ser atendidos, por enfermería.            | 1             | 2               | 3                     | 9     |
| 3. “No los veo, ya que no me los deriva el médico.”                      | 1             | 2               | 3                     | 9     |
| 4. La enfermera debe enseñarles en el manejo de la medicación            | 1             | 2               | 3                     | 9     |
| 5. Son pacientes que necesitan principalmente de los cuidados enfermeros | 1             | 2               | 3                     | 9     |

**C.14 ¿Cree que los pacientes que han sufrido un evento coronario, tienen afectado su estilo de vida diario durante el primer año del evento?** PROG: RESPUESTA ÚNICA

1 ☐ Mucho

2 ☐ Bastante

3 ☐ Poco

4 ☐ Nada

9 ☐ NS/NC

**C.15 En su opinión, ¿qué porcentaje de sus pacientes que han sufrido un evento coronario, alcanzan los siguientes objetivos terapéuticos, tal y como recomiendan las actuales guías de tratamiento?** PROG: RESPUESTA ÚNICA POR FILA

|                     | Ninguno | ≤10% | 11-30% | 31-50% | >50% | NS/NC |
|---------------------|---------|------|--------|--------|------|-------|
| 1. Colesterol LDL   | 1       | 2    | 3      | 4      | 5    | 9     |
| 2. HbA1c            | 1       | 2    | 3      | 4      | 5    | 9     |
| 3. Tensión Arterial | 1       | 2    | 3      | 4      | 5    | 9     |

**C.16 ¿Cuenta en su centro de salud con alguna guía clínica o protocolo de enfermería acerca de los Cuidados Cardiovasculares?** **PROG: RESPUESTA ÚNICA**

- 1 ☐ Si  
2 ☐ No

#### **D. CONTINUIDAD ASISTENCIAL Y DE CUIDADOS**

**D.17 ¿En qué medida recibes informe de alta de Enfermería de los pacientes que han sufrido un evento coronario?** **PROG: RESPUESTA ÚNICA**

- 1 ☐ Nunca los recibo **PROG: saltar a D.21**  
2 ☐ Casi nunca  
3 ☐ Ocasionalmente  
4 ☐ Casi siempre  
5 ☐ Siempre  
9 ☐ NS/NC

**D.18 ¿En qué formato lo recibe?** **PROG: RESPUESTA MÚLTIPLE**

- 1 ☐ Vía e-mail  
2 ☐ Informe en papel  
3 ☐ Informe vía informática compartida  
9 ☐ NS/NC

**D.19 El informe al alta que recibe de sus pacientes ¿qué contenidos tiene? Por favor, marque todos los que contenga** **PROG: RESPUESTA MÚLTIPLE**

- 1 ☐ Plan de Cuidados de enfermería  
2 ☐ Diagnósticos enfermeros alterados  
3 ☐ Recomendaciones de Autocuidados Cardiovasculares  
4 ☐ Indican cuando realizar el siguiente control analítico  
9 ☐ NS/NC

**D.20 ¿Qué tipo de recomendaciones contiene el informe de alta?** **PROG: RESPUESTA MÚLTIPLE**

- 1 ☐ Dieta y manejo del peso  
2 ☐ Actividad física  
3 ☐ Deshabituación tabáquica

- 4 ☐ Manejo de otros factores de riesgo cardiovascular
- 5 ☐ Regreso a la vida laboral y discapacidades
- 6 ☐ La reanudación de la actividad sexual
- 7 ☐ La utilización de la nitroglicerina

**D.21 ¿Existe Unidad de Rehabilitación Cardíaca en el hospital de referencia de su centro de salud?** **PROG: RESPUESTA ÚNICA**

- 1 ☐ Sí
- 2 ☐ No **PROG: SALTAR A D.25**

**D.22 ¿Cuál es el canal de comunicación establecido con la enfermera de la Unidad de Rehabilitación Cardíaca (URhC) o de cardiología de tu hospital de referencia?** **PROG: RESPUESTA MÚLTIPLE**

- 1 ☐ Ninguna
- 2 ☐ Vía telefónica
- 3 ☐ Vía email
- 4 ☐ Vía web (consulta electrónica, programas de integración online...)
- 5 ☐ Presencial en el centro de salud
- 8 ☐ Otras \_\_\_\_\_

**D.23 ¿Con qué periodicidad aproximada mantiene actualmente comunicación/interacción con la enfermera de la Unidad de Rehabilitación cardíaca o de cardiología?** **PROG: RESPUESTA ÚNICA**

- 1 ☐ Ninguna
- 2 ☐ Muy frecuente (al menos 1 vez al mes)
- 3 ☐ Regular (menos de 1 vez al mes)
- 4 ☐ Sólo cuando lo solicita o de manera muy esporádica

**D.24 ¿Existen programas de rotación formativa, propuestos por los centros referentes de cardiología, para la formación en prevención secundaria de enfermeras de AP?** **PROG: RESPUESTA ÚNICA**

- 1 ☐ Sí
- 2 ☐ No **PROG: saltar a D.25**

**PROG: sólo para D.24=1**

**D.24.a En el caso de que existan programas de rotación formativa, por favor, indique la / las que correspondan:**

1 ☐ Las enfermeras de AP rotan en las Unidades de Cardiología

2 ☐ Las enfermeras de la URhC o de cardiología forman a enfermeras de AP en los centros de salud

**D.25 En su opinión, ¿considera que se favorece desde los órganos de gestión la continuidad de cuidados entre el nivel hospitalario con atención primaria en los pacientes con un evento coronario?** **PROG: RESPUESTA ÚNICA**

1 ☐ Si

2 ☐ No

**D.26 Por favor, marque su satisfacción en relación a la continuidad de cuidados entre el nivel hospitalario con atención primaria en los pacientes con un evento coronario. *Considere que 1 es muy poco satisfecho y 10 muy satisfecho.***

**PUNTUACIÓN** \_\_\_\_\_

#### **E. DATOS SOCIO-LABORALES**

**E.27 Centro de Salud de trabajo:** \_\_\_\_\_

**E.28 Municipio:** \_\_\_\_\_

**E.29 Provincia:** \_\_\_\_\_

**E.30 Ámbito donde se encuentra el Centro de Salud**

1 ☐ Urbano (más de 10.000 habitantes)

2 ☐ Rural (menos de 10.000 habitantes)

3 ☐ NS/NC

**E.31 Número de años trabajados en Atención Primaria**

**Años:** \_\_\_\_\_

9 ☐ NS/NC

**E.32 ¿Señala tu situación laboral actual desde Enero de 2016?**

1 ☐ Fijo

2 ☐ Contrato Interino

3 ☐ Contrato suplente desde Enero 2016 de forma continua

9 ☐ NS/NC

### **E.33 Turno de trabajo**

- 1** ☐ Mañana
- 2** ☐ Tarde
- 3** ☐ Mañana/Tarde (rotativo / deslizante)

### **E.34 ¿Estarías dispuesto a participar más adelante en algún grupo de discusión o entrevista, sobre los cuidados cardiovasculares en la prevención secundaria cardiovascular que la enfermera de atención primaria aplica en sus consultas?**

- 1** ☐ Sí → E.34.a Teléfono de contacto
- 2** ☐ No
- 3** ☐ Sí, pero no en estos momentos

## ENCUESTA DIRIGIDA A ENFERMERAS DE AP – Posterior al curso

### A. NIVEL DE SATISFACCIÓN DEL CURSO ON-LINE

A.1 ¿Considera que la realización del Curso CCvI ha **mejorado sus conocimientos** sobre los Cuidados Cardiovasculares Integrales (CCvI)? : **PROG: RESPUESTA ÚNICA**

- 1 ☐ Mucho
- 2 ☐ Bastante
- 3 ☐ Regular
- 4 ☐ Poco
- 5 ☐ Nada
- 9 ☐ NS/NC

A.2 ¿Considera que la realización del Curso CCvI ha **mejorado el abordaje** de sus pacientes post-infartados durante los primeros meses del evento coronario?: **PROG: RESPUESTA ÚNICA**

- 1 ☐ Mucho
- 2 ☐ Bastante
- 3 ☐ Regular
- 4 ☐ Poco
- 5 ☐ Nada
- 9 ☐ NS/NC

A.3 ¿Cuál es su nivel de satisfacción con los contenidos modulares del curso?

|                                                                                                          | Muy alto | Alto | Regular | Bajo | Muy bajo | NS/NC |
|----------------------------------------------------------------------------------------------------------|----------|------|---------|------|----------|-------|
| 1. <b>Módulo I.</b> Prevención Secundaria Cardiovascular en Atención Primaria                            | 1        | 2    | 3       | 4    | 5        | 9     |
| 2. <b>Módulo II.</b> Cronicidad y Adherencia al Plan Terapéutico                                         | 1        | 2    | 3       | 4    | 5        | 9     |
| 3. <b>Módulo III.</b> Cuidados Cardiovasculares Integrales en la PSCV desde la enfermería de A. Primaria | 1        | 2    | 3       | 4    | 5        | 9     |



A.4 ¿Cree oportuno que los pacientes postinfartados tengan un seguimiento protocolizado de visitas durante los primeros 12-18 meses tras el evento cardiaco por parte de la enfermera de Atención Primaria?

- 1 ☐ Mucho
- 2 ☐ Bastante
- 3 ☐ Regular
- 4 ☐ Poco
- 5 ☐ Nada
- 9 ☐ NS/NC

A.5 La participación en este estudio, ¿le ha cambiado la forma de realizar el seguimiento a los pacientes postinfartados?

- 1 ☐ Mucho
- 2 ☐ Bastante
- 3 ☐ Regular
- 4 ☐ Poco
- 5 ☐ Nada
- 9 ☐ NS/NC

A.6 ¿Recomendaría a otra enfermera la protocolización de las consultas del módulo 3, para realizar un seguimiento de los pacientes postinfartados?

- 1 ☐ Mucho
- 2 ☐ Bastante
- 3 ☐ Regular
- 4 ☐ Poco
- 5 ☐ Nada
- 9 ☐ NS/NC

A.7 ¿Recomendaría a otra enfermera la realización de este Curso de CCvI?

- 1 ☐ Mucho
- 2 ☐ Bastante
- 3 ☐ Regular
- 4 ☐ Poco
- 5 ☐ Nada
- 9 ☐ NS/NC

A.8 En general, ¿Cree que el curso ha cumplido sus expectativas iniciales respecto a los Cuidados Cardiovasculares Integrales en pacientes postinfartados?

- 1 ☐ Mucho
- 2 ☐ Bastante
- 3 ☐ Regular
- 4 ☐ Poco
- 5 ☐ Nada
- 9 ☐ NS/NC

## B. CONOCIMIENTOS

“En personas con enfermedad vascular clínica diagnosticada (IAM, SCA, Revascularización, Ictus; EAP) y según las últimas Guías Europeas<sup>2</sup>, los objetivos de la prevención secundaria cardiovascular son:”

**B.4 Cifras de Presión arterial:** PROG: RESPUESTA ÚNICA

- 1 ☐ < 130/80 mmHg
- 2 ☐ < 140/90 mmHg
- 3 ☐ < 135/85 mmHg
- 9 ☐ No sabe

**B.5 Cifras de HbA1c. Glucosa Sanguínea:** PROG: RESPUESTA ÚNICA

- 1 ☐ ≤ 6,5%
- 2 ☐ ≤ 7%
- 3 ☐ ≤ 7,5%
- 9 ☐ No sabe

**B.6 Cifras de Colesterol Total:** PROG: RESPUESTA ÚNICA

- 1 ☐ ≈ 200 mg/dl
- 2 ☐ ≈ 250 mg/dl
- 3 ☐ ≈ 170 mg/dl
- 9 ☐ No sabe

---

<sup>2</sup> Piepoli MF, Hoes AW, Agewall S, Albus C, Brotons C, Catapano AL, et al ; Authors/Task Force Members. 2016 European Guidelines on cardiovascular disease prevention in clinical practice: The Sixth Joint Task Force of the European Society of Cardiology and Other Societies on Cardiovascular Disease Prevention in Clinical Practice. Eur Heart J. 2016 May 23. pii: ehw106

**B.7 Cifras de LDL colesterol:** PROG: RESPUESTA ÚNICA

- 1 ☐  $\approx$  120 mg/dl
- 2 ☐  $\approx$  100 mg/dl
- 3 ☐  $\approx$  70 mg/dl
- 9 ☐ No sabe

**B.8 Cifras Perímetro Abdominal:** PROG: RESPUESTA ÚNICA

- 1 ☐ 80-88 mujeres/ 94-102 hombres
- 2 ☐ 90-100 mujeres/ 100-110 hombres
- 3 ☐ 70-80 mujeres/ 80-90 hombres
- 9 ☐ No sabe

**B.9 Cifras Índice Tobillo/Brazo:** PROG: RESPUESTA ÚNICA

- 1 ☐  $\approx$  1
- 2 ☐  $\approx$  0,5
- 3 ☐  $\approx$  1,5
- 9 ☐ No sabe

**C. GRADO DE APLICACIÓN**

**C.10 ¿Atiende, como motivo de consulta, a pacientes que han sufrido un EVENTO CORONARIO (SCA, Angina de pecho, etc.)?** PROG: RESPUESTA ÚNICA

- 1 ☐ Si
- 2 ☐ No PROG: Saltar a C.16

**C.11 Durante los DOS ÚLTIMOS MESES ¿Cuántos pacientes atendidos en su consulta, aproximadamente, han sido por estar diagnosticados de EVENTO CORONARIO (SCA, Angina de pecho, etc.)?** PROG: RESPUESTA ÚNICA

- 1 ☐ Ninguno
- 2 ☐  $\leq$  5 / semana
- 3 ☐ 6-10 / semana
- 4 ☐ 11- 15 / semana
- 5 ☐  $>$  15 / semana
- 9 ☐ NS/NC

PROG: SOLO SI COD. 2, 3, 4 O 5 EN C.11

**C.12 Y de estos pacientes atendidos por estar diagnosticados de EVENTO CORONARIO, ¿Qué porcentaje de ellos le ha realizado las siguientes actividades?** PROG: RESPUESTA ÚNICA POR FILA

|                                                              | Ninguno | ≤10% | 11-30% | 31-50% | >50% | NS/NC |
|--------------------------------------------------------------|---------|------|--------|--------|------|-------|
| 4. Medida del perímetro abdominal                            | 1       | 2    | 3      | 4      | 5    | 9     |
| 5. Valoración de parámetros analíticos dislipémicos          | 1       | 2    | 3      | 4      | 5    | 9     |
| 6. Seguimiento de la adherencia al tratamiento farmacológico | 1       | 2    | 3      | 4      | 5    | 9     |

**C.13 Y ¿cuál es su grado de acuerdo con los siguientes enunciados en relación con los pacientes referidos anteriormente?** PROG: RESPUESTA ÚNICA POR FILA

|                                                                           | En desacuerdo | Algo de acuerdo | Totalmente de acuerdo | NS/NC |
|---------------------------------------------------------------------------|---------------|-----------------|-----------------------|-------|
| 6. "Como no son pacientes crónicos, no los atiendo en consulta."          | 1             | 2               | 3                     | 9     |
| 7. Son pacientes que no han de ser atendidos, por enfermería.             | 1             | 2               | 3                     | 9     |
| 8. "No los veo, ya que no me los deriva el médico."                       | 1             | 2               | 3                     | 9     |
| 9. La enfermera debe enseñarles en el manejo de la medicación             | 1             | 2               | 3                     | 9     |
| 10. Son pacientes que necesitan principalmente de los cuidados enfermeros | 1             | 2               | 3                     | 9     |

**C.14 ¿Cree que los pacientes que han sufrido un evento coronario, tienen afectado su estilo de vida diario durante el primer año del evento?** PROG: RESPUESTA ÚNICA

- 1 ☐ Mucho  
2 ☐ Bastante  
3 ☐ Poco  
4 ☐ Nada  
9 ☐ NS/NC

**C.15 En su opinión, ¿qué porcentaje de sus pacientes que han sufrido un evento coronario, alcanzan los siguientes objetivos terapéuticos, tal y como recomiendan las actuales guías de tratamiento?** PROG: RESPUESTA ÚNICA POR FILA

|                     | Ninguno | ≤10% | 11-30% | 31-50% | >50% | NS/NC |
|---------------------|---------|------|--------|--------|------|-------|
| 4. Colesterol LDL   | 1       | 2    | 3      | 4      | 5    | 9     |
| 5. HbA1c            | 1       | 2    | 3      | 4      | 5    | 9     |
| 6. Tensión Arterial | 1       | 2    | 3      | 4      | 5    | 9     |

**C.16 ¿Cuenta en su centro de salud con alguna guía clínica o protocolo de enfermería acerca de los Cuidados Cardiovasculares?** PROG: RESPUESTA ÚNICA

- 1 ☐ Si  
2 ☐ No

## D. CONTINUIDAD ASISTENCIAL Y DE CUIDADOS

**D.22 ¿Desde la realización de la pre-encuesta (Enero 2018), en el hospital de referencia de su centro de salud...** **PROG: RESPUESTA ÚNICA**

- 1 ☐ Se ha abierto una nueva Unidad de Rehabilitación Cardíaca
- 2 ☐ Continuamos con la misma Unidad de Rehabilitación Cardíaca
- 3 ☐ Continuamos sin Unidad de Rehabilitación Cardíaca **PROG: Saltar a P.26**
- 9 ☐ NS/NC

**D.23 ¿Cuál es el canal de comunicación establecido con la enfermera de esta nueva Unidad de Rehabilitación Cardíaca (URhC) de su hospital de referencia?** **PROG: RESPUESTA MÚLTIPLE**

- 1 ☐ Ninguna
- 2 ☐ Vía telefónica
- 3 ☐ Vía email
- 4 ☐ Vía web (consulta electrónica, programas de integración online...)
- 5 ☐ Presencial en el centro de salud
- 8 ☐ Otras \_\_\_\_\_

**D.24 ¿Con qué periodicidad aproximada mantiene comunicación/interacción con la enfermera de esta nueva Unidad de Rehabilitación Cardíaca?** **PROG: RESPUESTA ÚNICA**

- 1 ☐ Ninguna
- 2 ☐ Muy frecuente (al menos 1 vez al mes)
- 3 ☐ Regular (menos de 1 vez al mes)
- 4 ☐ Sólo cuando lo solicita o de manera muy esporádica

**D.25 Por favor, marque su satisfacción en relación a la continuidad de cuidados entre el nivel hospitalario con atención primaria desde el inicio de esta nueva Unidad de Rehabilitación Cardíaca.** *Considere que 1 es muy poco satisfecho y 10 muy satisfecho.*

PUNTUACIÓN \_\_1 2 3 4 5 6 7 8 9 10\_\_

**D.26 A raíz de realizar el Curso de CCvI, ¿ha iniciado o incrementado, la comunicación con las Unidades de Rehabilitación Cardíaca o de Cardiología respecto a la continuidad asistencial?**

- 1** ☐ Mucho
- 2** ☐ Bastante
- 3** ☐ Poco
- 4** ☐ Nada
- 9** ☐ NS/NC

**D.27 En caso de haber iniciado o incrementado la relación con dichas unidades, enumere por favor las acciones realizadas.**

- \_\_\_\_\_
- \_\_\_\_\_
- \_\_\_\_\_

**E.34 ¿Estaría dispuesta/o a participar más adelante en algún grupo de discusión o entrevista, sobre los cuidados cardiovasculares en la prevención secundaria cardiovascular que la enfermera de atención primaria aplica en sus consultas?**

- 1** ☐ Sí → E.34.a Teléfono de contacto \_\_\_\_\_
- 2** ☐ No
- 3** ☐ Sí, pero no en estos momentos
